# Supplementary material for: 14-3-3 Regulates Actin Filament Formation in the Deep-Branching Eukaryote Giardia lamblia
Source: PubMed Central journal article supplement (PMC5597967; doi:10.1128/msphere.00248-17), 2017-09-13

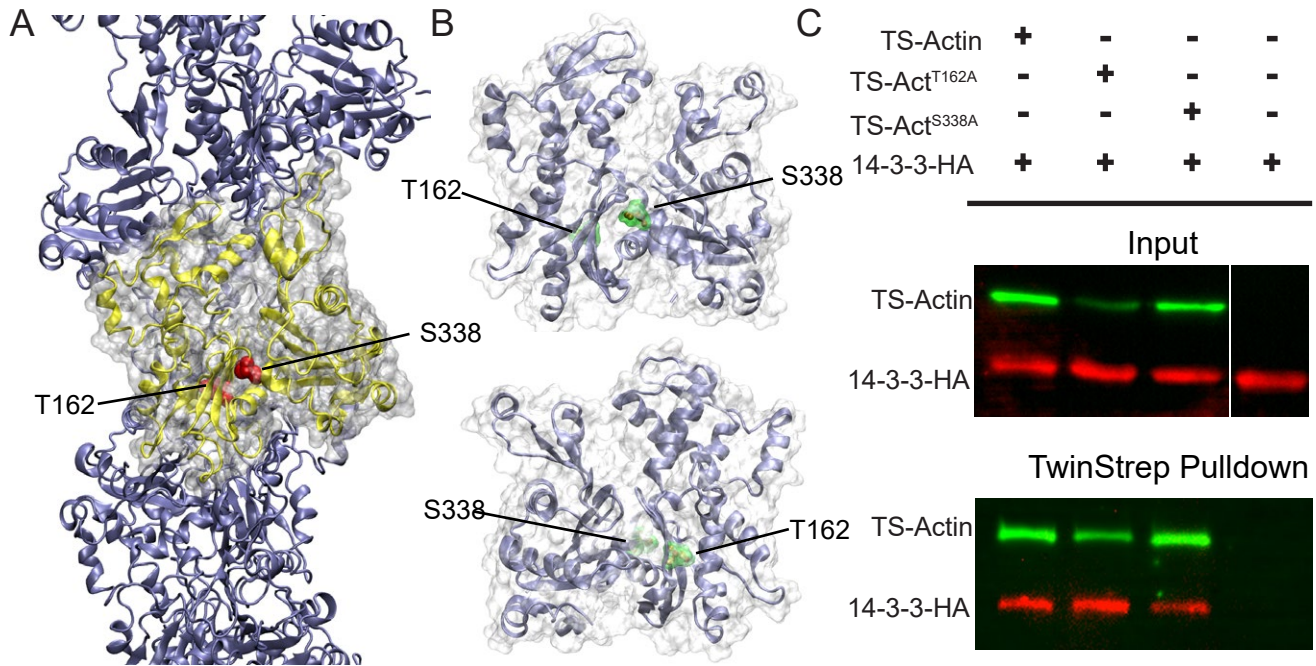

Supplement: sph005172359sf4.pdf [file sph005172359sf4.pdf]
